# Supplementary material for: MyoD Over-Expression Rescues GST-bFGF Repressed Myogenesis
Source: MDPI journal article supplement (doi:10.3390/ijms25084308), 2024-04-13
Supplement: s1 [file s1]

# Supplementary Figure S1

(A)

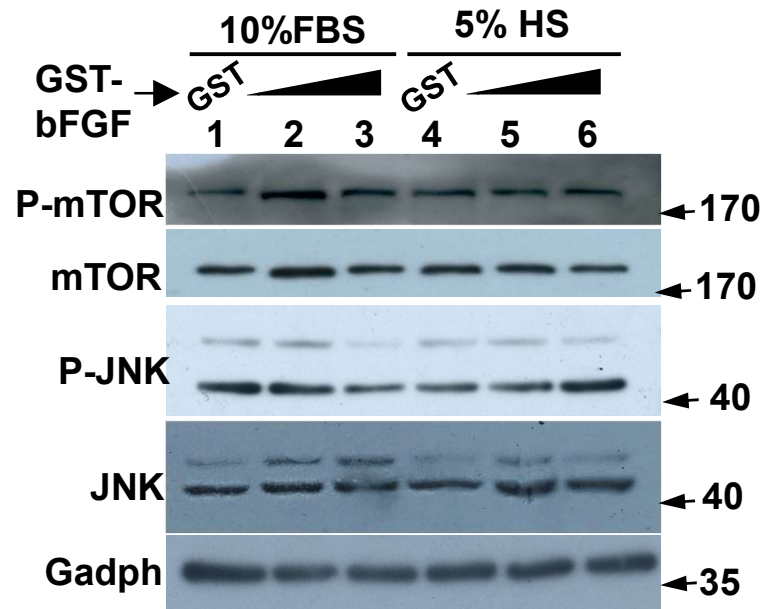

(C)

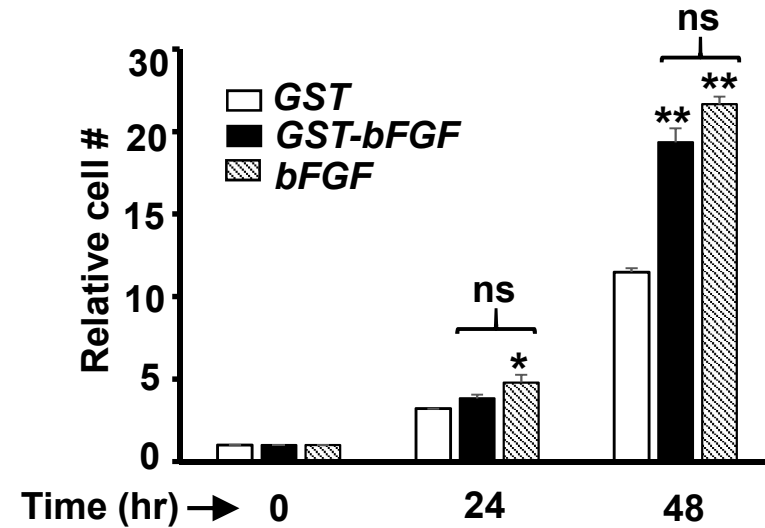

(B)

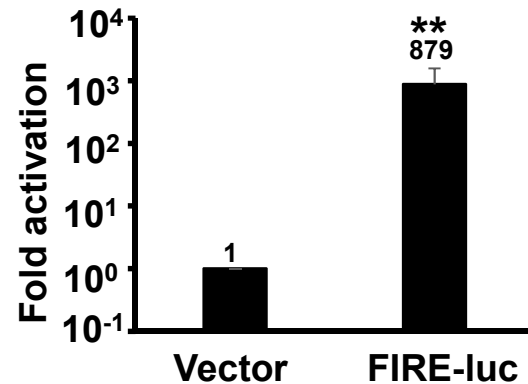

**Supplementary Figure S1: The effect of GST-bFGF on cell signaling and proliferation.** (A) C2C12 myoblasts in both growth medium (GM, 10% FCS) and differentiation medium (DM, 5% HS) were treated with GST (100 ng/ml) or GST-bFGF (50 and 100 ng/ml) for 24 h. The signaling proteins in total lysate were examined by Western blot and the signal of Gapdh served as input control. (B) The pGL3-basic vector and FGF reporter FIRE-luc were transfected into C2C12 and kept in GM with GST (50 ng/ml) for 48 hr before harvested for luciferase activity assay. The activity in pGL3-basic vector transfected cells was set as 1-fold activation. \*\*: p < 0.01 vs. vector. (C) C2C12 myoblasts in GM were treated with GST or GST-bFGF protein (25 ng/ml) for 24~48 hr and their relative cell numbers at 24 and 48 hr after seeding were examined. The initial cell number (time=0) was set as 1-fold. \* and \*\*: p < 0.05 and p < 0.01 vs. GST-treated cells. N=2 for this proliferation assay.

## Supplementary Figure S2

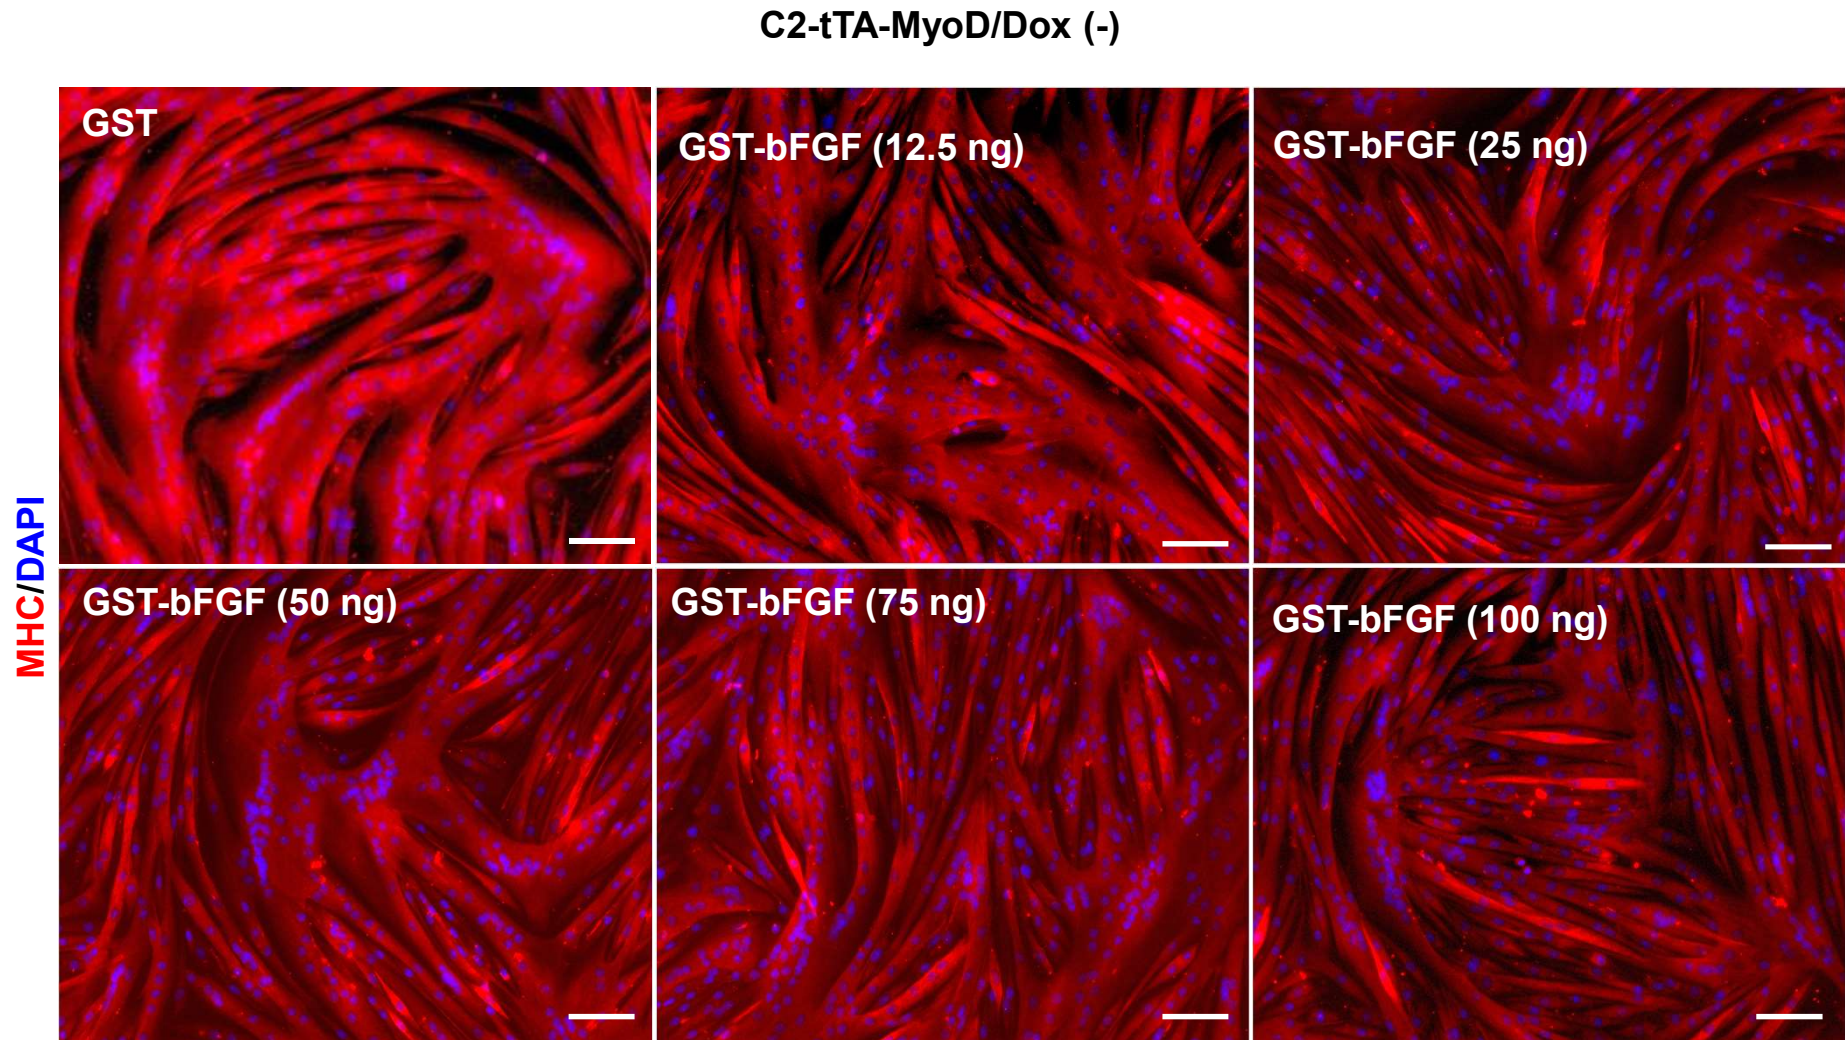

**Supplementary Figure S2: The morphology of C2-tTA-MyoD myotubes.**

C2-tTA-MyoD cells were induced to differentiation in DM and treated with various doses of GST-bFGF (as indicated) for 4 days in the absence of Dox.

**Supplementary table SI: Primer sets used in the qRT-PCR and cloning.**

| <b>Gene name</b>           | <b>Primer Sequence</b>                                                      | <b>NCU code</b>    | <b>Amplicon Size (bp)</b> |
|----------------------------|-----------------------------------------------------------------------------|--------------------|---------------------------|
| <i>m36B4</i>               | FP:5'-GAACGTGGGCTTCGTGTTCA-3'<br>RP:3'-AGCCTGGAAGAAGGAGGTCT-3'              | 014023<br>014024   | 167                       |
| <i>MyoD</i>                | FP:5'-CTCCAAGTGTCTGATGGCATG-3'<br>RP:3'-CTCGACACAGCCGCACTCTTC-3'            | 002021<br>002022   | 135                       |
| <i>Myf5</i>                | FP:5'-TGCACCACCACCAACCCTAA-3'<br>RP:5'-CAGGGCTGTTACATTTCAGG-3'              | 015052<br>015053   | 196                       |
| <i>Myogenin</i>            | FP:5'-CCAGTGAATGCAACTCCCACAGC-3'<br>RP:5'-AGACATATCCTCCACCGTGA-3'           | 006012<br>006013   | 166                       |
| <i>c-Myc</i>               | FP:5'-GCTGGATTTCTTTGGGCGT-3'<br>RP:5'-AATAGGGCTGTACGGAGTCG-3'               | 021018<br>021019   | 112                       |
| <i>CyclinD1</i>            | FP:5'-TTGACTGCCGAGAAGTTGTG-3'<br>RP:5'-CTGGCATTCTTGGAGAGGAAG-3'             | 054009<br>054010   | 154                       |
| <i>p21</i>                 | FP:5'-GCCGAAAACGGAGGCAGAC-3'<br>RP:5'-AAGATGGGGAAGAGGCCTCCTGA-3'            | 006007<br>006008   | 139                       |
| <i>Pax3</i>                | FP:5'-ACTACCCAGACATTTACACCAGG-3'<br>RP:5'-AATGAGATGGTTGAAAGCCATCAG-3'       | 066021<br>066022   | 146                       |
| <i>Pax7</i>                | FP:5'-TGGGGTCTTCATCAACGGTC-3'<br>RP:5'-ATCGGCACAGAATCTTGGAGA-3'             | 066007<br>066008   | 143                       |
| <i>Myostatin</i>           | FP:5'-AGTGGATCTAAATGAGGGCAGT-3'<br>RP:5'-GTTTCCAGGCGCAGCTTAC-3'             | 066035<br>066036   | 144                       |
| <i>c-Fos</i>               | FP:5'-CAGAGCGGGAATGGTGAAGA-3'<br>RP:5'-CTGTCTCCGCTTGGAGTGTA-3'              | 066001<br>066002   | 188                       |
| <i>bFGF</i> CDS<br>(outer) | FP: 5'-ACACGGACTGGGAGGCTGGC-3'<br>RP: 5'-TGACAGTGTCTCAGTGACAGTGTC-3'        | 0360010<br>0360011 | 615                       |
| <i>bFGF</i> CDS<br>(inner) | FP: 5'-ATGGCTGCCAGCGGCATCACCTCGCTT-3'<br>RP: 5'-gtcgacGCTCTTAGCAGACATTGG-3' | 036009<br>036006   | 468                       |
|                            |                                                                             |                    |                           |
